# Supplementary material
Source: MDPI journal article supplement (https://www.mdpi.com/2379-139X/8/6/231)
Supplement: s1 [file s1]

**Table S1: CT findings of thoracic inlet pathologies and their corresponding chest radiographic findings**

| <b>Pathologies</b>               | <b>CT findings</b>                                                                                                              | <b>Corresponding chest radiographic findings</b> |
|----------------------------------|---------------------------------------------------------------------------------------------------------------------------------|--------------------------------------------------|
| <b>Traumatic</b>                 |                                                                                                                                 |                                                  |
| <b>Mediastinal fat stranding</b> | Fat haziness within mediastinum, usually surrounding vascular structures                                                        | Abnormal mediastinum                             |
| <b>Mediastinal hemorrhage</b>    | Discrete slightly hyperattenuating collection within mediastinum, potentially surrounding vascular structures                   | Abnormal mediastinum                             |
| <b>Pneumomediastinum</b>         | Extraluminal air within soft tissues of mediastinum                                                                             | Same as CT                                       |
| <b>Pulmonary contusion</b>       | Fluffy, ill-defined airspace opacification in the lungs not respecting anatomical boundaries; may spare subpleural region       | Patchy pulmonary opacification                   |
| <b>Pulmonary laceration</b>      | Pulmonary cavity filled with blood, air or both and surrounded by pulmonary contusion                                           | Usually not seen                                 |
| <b>Pneumothorax</b>              | Extraluminal air collection inside pleural cavity, often in curvilinear shape                                                   | Same as CT                                       |
| <b>Pleural fluid</b>             | Fluid of variable attenuation within pleural cavity, usually in dependent portion                                               | Apical cap                                       |
| <b>Extrapleural hematoma</b>     | High-attenuating collection, often biconvex shape and at site of rib fracture, displacing extrapleural fat inwardly to the lung | Apical cap                                       |
| <b>Rib fracture</b>              | Cortical break – without or with displacement – of ribs                                                                         | Same as CT                                       |
| <b>Clavicle fracture</b>         | Cortical break – without or with displacement – of clavicle                                                                     | Same as CT                                       |

|                                      |                                                                                                                                                                                                                                                                                                                                                     |                      |
|--------------------------------------|-----------------------------------------------------------------------------------------------------------------------------------------------------------------------------------------------------------------------------------------------------------------------------------------------------------------------------------------------------|----------------------|
| <b>Acromioclavicular dislocation</b> | Loss of normal articulation between acromion and distal clavicle                                                                                                                                                                                                                                                                                    | Same as CT           |
| <b>Scapular fracture</b>             | Cortical break – without or with displacement – of scapula                                                                                                                                                                                                                                                                                          | Same as CT           |
| <b>Significant nontraumatic</b>      |                                                                                                                                                                                                                                                                                                                                                     |                      |
| <b>Mediastinal vascular dilation</b> | Dilation of artery ( $\geq 1.5$ times of expected normal caliber) – often a branch of aortic arch – within superior mediastinum                                                                                                                                                                                                                     | Abnormal mediastinum |
| <b>Pulmonary nodule(s)</b>           | Rounded or oval-shaped discrete noncalcific solid abnormality inside the lung parenchyma                                                                                                                                                                                                                                                            | Same as CT           |
| <b>Pulmonary micronodules</b>        | <p>Tiny pulmonary nodules of less than 4 mm; having various shapes and arrangements including</p> <ul style="list-style-type: none"> <li>- Tree-in-bud (V- or Y-shaped micronodules in lung periphery)</li> <li>- Centrilobular (micronodules in centrilobular distribution; not touching pleurae/fissures)</li> <li>- Other appearances</li> </ul> | Usually not seen     |
| <b>Groundglass opacity</b>           | Increased lung opacity without obscuration of lung markings                                                                                                                                                                                                                                                                                         | Usually not seen     |
| <b>Groundglass nodule(s)</b>         | Similar to pulmonary nodule(s) but attenuation is lower (not obscure lung markings)                                                                                                                                                                                                                                                                 | Usually not seen     |
| <b>Cavity</b>                        | Air-filled collection with soft-tissue rims within lung parenchyma                                                                                                                                                                                                                                                                                  | Same as CT           |
| <b>Atelectasis</b>                   | Airspace parenchymal opacification with loss of volume                                                                                                                                                                                                                                                                                              | Same as CT           |

|                               |                                                                                                                                         |                  |
|-------------------------------|-----------------------------------------------------------------------------------------------------------------------------------------|------------------|
| <b>Septal thickening</b>      | Thickened interlobular septa of lung parenchyma                                                                                         | Usually not seen |
| <b>Active tuberculosis</b>    | Cavity, tree-in-bud and centrilobular pulmonary micronodules, pulmonary nodule(s), groundglass opacity in uni- or bilateral lung apices | Same as CT       |
| <b>Pulmonary malignancy</b>   | Irregular-shaped pulmonary nodule(s) or mass(es) with or without spiculated border                                                      | Same as CT       |
| <b>Foreign body</b>           | Abnormal structure of various attenuation and shape usually within esophagus or trachea                                                 | Same as CT       |
| <b>Malignant bone lesions</b> | Lucent or sclerotic lesions associated with soft tissue masses                                                                          | Same as CT       |
| <b>Non-significant</b>        |                                                                                                                                         |                  |
| <b>Parenchymal scars</b>      | Linear or curvilinear pulmonary opacities associated with distortion of pulmonary architecture                                          | Usually not seen |
| <b>Calcifications</b>         | High attenuation foci or nodule(s)                                                                                                      | Same as CT       |
| <b>Bronchiectasis</b>         | Dilation of bronchi greater than their accompanying pulmonary artery branches                                                           | Usually not seen |
| <b>Emphysema</b>              | Increased lucency of pulmonary parenchyma without definable walls; without or with stretched lung markings                              | Same as CT       |
| <b>Blebs/bulla</b>            | Focal lucency within pulmonary parenchyma with thin walls                                                                               | Usually not seen |
| <b>Benign bone lesions</b>    | Bone islands; lucent lesions with complete and smooth sclerotic rims                                                                    | Same as CT       |

**Table S2: Performance of portable trauma chest radiography in identification of thoracic inlet abnormalities\* using cervical spine CT as a reference standard**

|                                                      | True<br>positive | False<br>positive | False<br>negative | True<br>negative | Sensitivity<br>(95% CI)              | Specificity<br>(95% CI)              |
|------------------------------------------------------|------------------|-------------------|-------------------|------------------|--------------------------------------|--------------------------------------|
| <b>Overall<br/>performance</b>                       | <b>90</b>        | <b>7</b>          | <b>159</b>        | <b>129</b>       | <b>36.14</b><br><b>(30.17-42.45)</b> | <b>94.85</b><br><b>(89.68-97.91)</b> |
| <b>All traumatic<br/>findings</b>                    | <b>52</b>        | <b>51</b>         | <b>40</b>         | <b>242</b>       | <b>56.52</b><br><b>(45.78-67.83)</b> | <b>82.59</b><br><b>(77.76-86.76)</b> |
| <b>Abnormal<br/>mediastinum</b>                      | 0                | 4                 | 11                | 370              | 0.00<br>(0-28.49)                    | 98.93<br>(97.28-99.71)               |
| <b>Pulmonary<br/>contusion</b>                       | 17               | 24                | 23                | 321              | 42.50<br>(27.04-59.11)               | 93.04<br>(89.83-95.49)               |
| <b>Pneumothorax</b>                                  | 9                | 0                 | 40                | 336              | 18.37<br>(8.76-32.02)                | 100<br>(98.91-100)                   |
| <b>Extrapleural<br/>hematoma</b>                     | 1                | 48                | 1                 | 335              | 50.00<br>(1.26-98.74)                | 87.47<br>(83.73-90.61)               |
| <b>Rib fracture</b>                                  | 12               | 10                | 12                | 351              | 50.00<br>(29.12-70.88)               | 97.23<br>(94.96-98.66)               |
| <b>Clavicle fracture</b>                             | 7                | 16                | 1                 | 361              | 87.50<br>(47.35-99.68)               | 95.76<br>(93.20-97.56)               |
| <b>Scapular fracture</b>                             | 0                | 3                 | 1                 | 381              | 0<br>(0-97.50)                       | 99.22<br>(97.73-99.84)               |
| <b>All significant<br/>nontraumatic<br/>findings</b> | <b>8</b>         | <b>8</b>          | <b>82</b>         | <b>287</b>       | <b>8.89</b><br><b>(3.92-16.77)</b>   | <b>97.29</b><br><b>(94.73-98.82)</b> |
| <b>Pulmonary<br/>nodule(s)</b>                       | 4                | 5                 | 27                | 349              | 12.90<br>(3.63-29.83)                | 98.59<br>(96.73-99.54)               |
| <b>Active<br/>tuberculosis</b>                       | 3                | 5                 | 10                | 367              | 23.08<br>(5.04-53.81)                | 98.66<br>(96.89-99.56)               |

|                                 |    |    |     |     |                        |                        |
|---------------------------------|----|----|-----|-----|------------------------|------------------------|
| <b>Destructive bone lesions</b> | 1  | 0  | 0   | 384 | 100<br>(2.50-100.00)   | 100<br>(99.04-100.00)  |
| <b>Nonsignificant findings</b>  | 13 | 12 | 211 | 149 | 5.80<br>(3.13-9.72)    | 92.55<br>(87.34-96.09) |
| <b>Parenchymal scars</b>        | 20 | 3  | 54  | 308 | 27.03<br>(17.35-38.61) | 99.04<br>(97.21-99.80) |
| <b>Calcifications</b>           | 4  | 0  | 11  | 370 | 26.67<br>(7.79-55.10)  | 100<br>(99.01-100)     |
| <b>Bronchiectasis</b>           | 0  | 1  | 24  | 360 | 0<br>(0.00-14.25)      | 99.72<br>(98.47-99.99) |
| <b>Emphysema/blebs</b>          | 1  | 0  | 92  | 292 | 1.08<br>(0.03-5.85)    | 100<br>(98.74-100)     |

\*Listed entities include those deemed potentially visible on chest radiography and were present in our study cohort

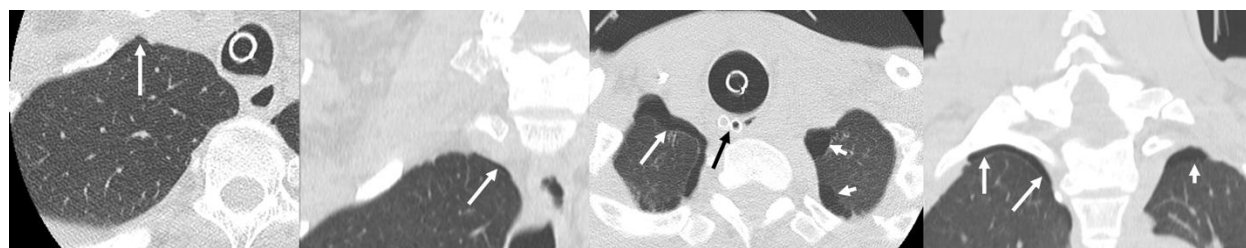

**Figure S1: Pneumothorax and subpleural bleb/bulla.** Axial and coronal-reformatted CT images in lung window of two different patients show minimal right pneumothorax (long arrows). A few small subpleural blebs/bullae (short arrows) in the left lung are convex toward the lung parenchyma. Perception of minimal pneumothorax may be improved with coronal reformation. Black arrow = esophagogastric tube coiled within the thoracic esophagus.

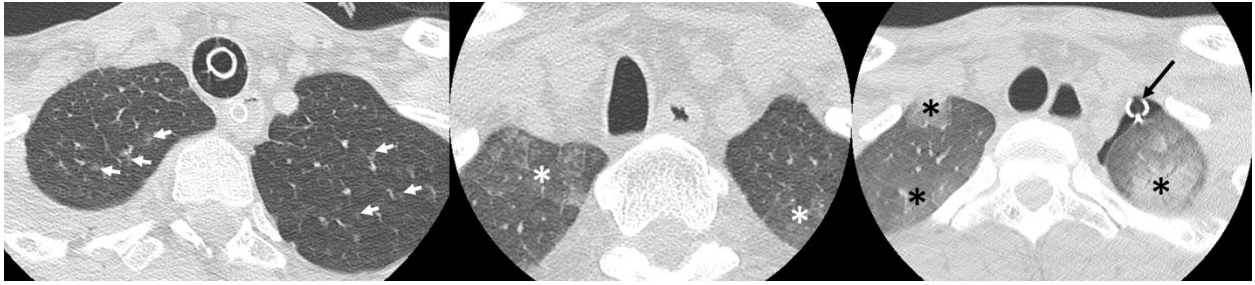

**Figure S2: Pulmonary contusion.** Axial CT images in lung window of three different patients show different features and extent of pulmonary contusion, which include small ill-defined centrilobular groundglass opacities (short arrows), ill-defined groundglass opacities superimposed with interlobular septal thickening (crazy paving pattern; white stars), and “fluffy” groundglass opacities with consolidations (black stars). Black arrow = intercostal drainage tube with left pneumothorax.

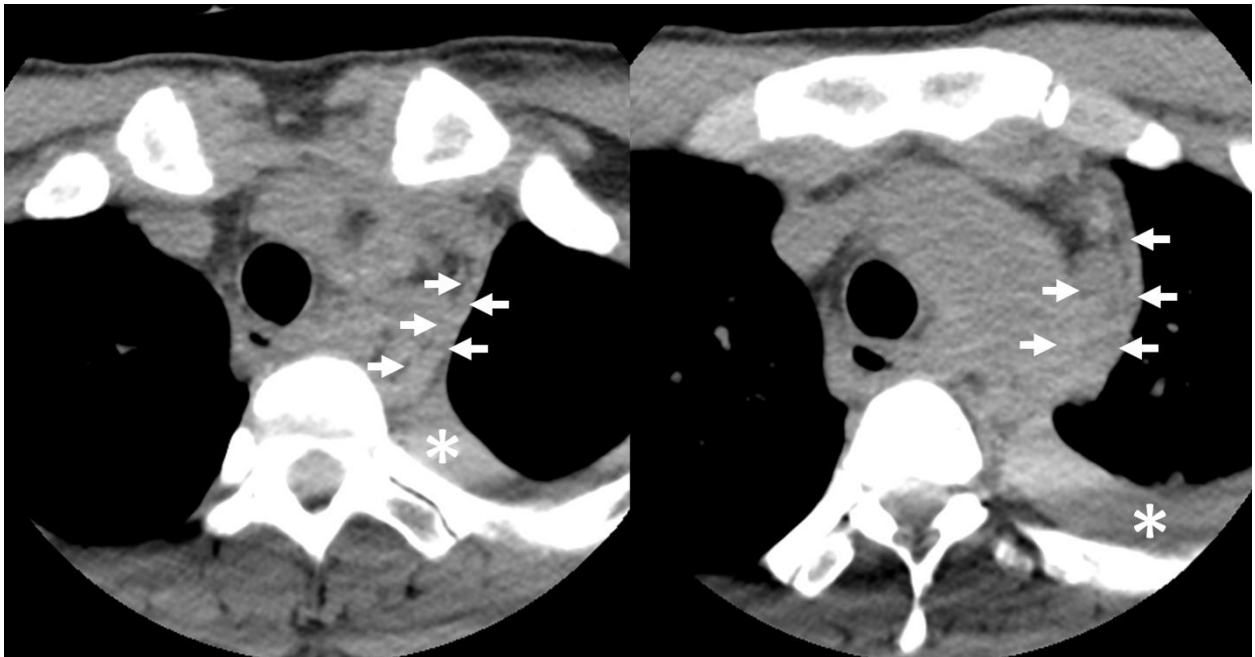

**Figure S3: Mediastinal hemorrhage.** Axial CT images in soft-tissue window show ill-defined isoattenuating bands or streaks (arrows) interspersed within superior mediastinal fat, abutting aortic arch and its branches. There is a small amount of isoattenuating left pleural fluid (stars), representing hemothorax.

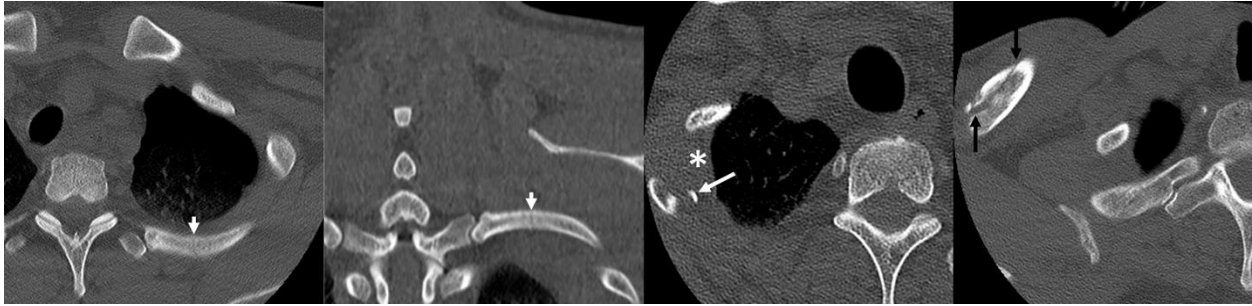

**Figure S4: Rib and clavicle fractures.** Axial and coronal-reformatted CT images in bone window/algorithm of three different patients show a nondisplaced fracture of the left posterior rib (short white arrows), a displaced rib fracture fragment (long white arrow) associated with an extrapleural hematoma (star), and a nondisplaced comminuted right clavicle fracture (black arrows). These can be easily overlooked on a cervical spine CT due to their subtlety and location at the edge of image series.

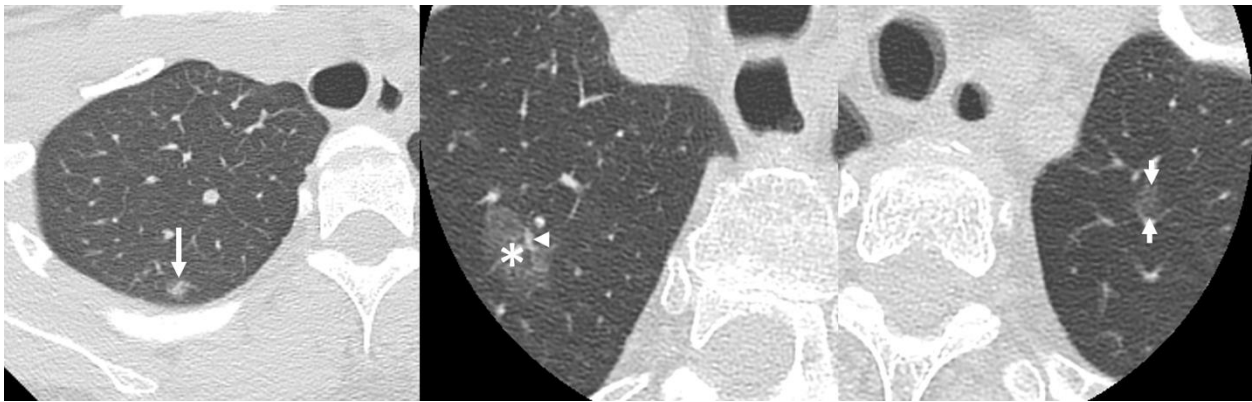

**Figure S5: Subsolid pulmonary nodules.** Axial CT images in lung window of three different patients reveal three subsolid pulmonary nodules. Two are part-solid groundglass nodules (long arrow and star), in which an arrowhead indicates a solid portion of the larger nodule. Short arrows point at a pure groundglass nodule.

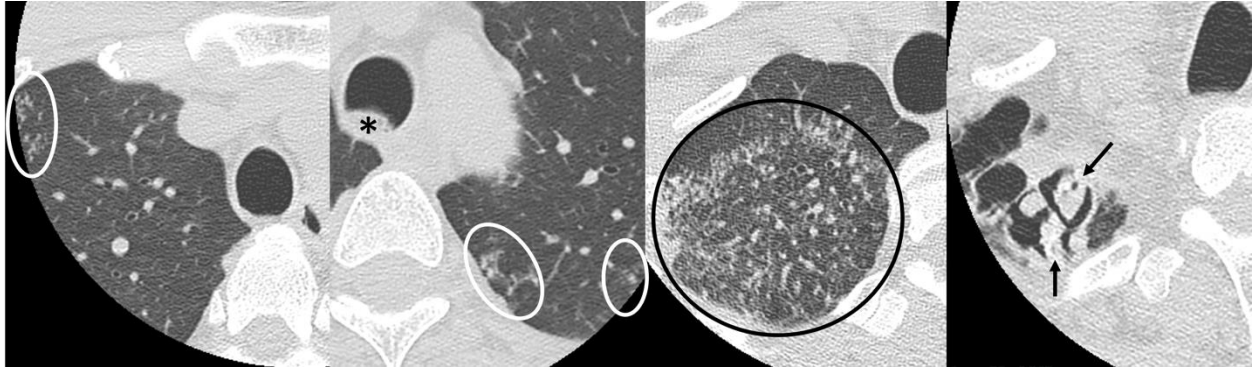

**Figure S6: Pulmonary micronodules and cavities.** Axial CT images in lung window of four different patients demonstrate small clusters of tree-in-bud opacification and centrilobular nodules (white oval), a larger area of the same abnormality (black oval), and a few air-filled cavities containing rounded contents (arrows). The black star represents fluid in the distal trachea.
